# Supplementary material for: Green and facile preparation and dual-enhancement cytotoxicity of eupatilin loaded on hollow gold nanoparticles under near-infrared light
Source: Royal Society of Chemistry journal article supplement (doi:10.1039/d1nj02276h), 2021-01-01
Supplement: d1nj02276h1.pdf [file d1nj02276h1.pdf]

## **Green and facile preparation and dual-enhancement cytotoxicity of eupatilin loaded on hollow gold nanoparticles under near-infrared light**

**Yi-wei Sun <sup>a</sup>, Hui Liang <sup>a</sup>, Kun-qi Zong <sup>a</sup>, Xin Che <sup>b,c,\*</sup> and Da-li Meng <sup>a,\*</sup>**

<sup>a</sup> School of Traditional Chinese Materia Medica, Shenyang Pharmaceutical University, Shenyang, 110016, PR China

<sup>b</sup> School of Pharmacy, Shenyang Pharmaceutical University, Shenyang, 110016, PR China

<sup>c</sup> Guizhou University of Traditional Chinese Medicine, Guiyang, 550025, PR China

\* Correspondence: \*E-mail: [mengdl@163.com](mailto:mengdl@163.com) (Da-li Meng) Tel.: +86-18341401069

\* E-mail: [chexin98@aliyun.com](mailto:chexin98@aliyun.com) (Xin Che) Tel.: +86-18341401348

## Supplementary Materials

|                                                                                     |   |
|-------------------------------------------------------------------------------------|---|
| Figure. S1 Zeta potential of HG NPs.....                                            | 3 |
| Figure. S2-1 <sup>1</sup> H-NMR of eupatilin .....                                  | 4 |
| Figure. S2-2 <sup>1</sup> H-NMR of E-HG NPs .....                                   | 4 |
| Figure. S2-3 <sup>1</sup> H-NMR of Eupatilin and E-HG NPs.....                      | 5 |
| Figure. S3 Eupatilin released from E-HG NPs with or without NIR<br>irradiation..... | 5 |

Sample Name: AuShell 2  
SOP Name: mansettings.nano  
File Name: 2017.03.23  
Record Number: 10  
Date and Time: 2017年3月23日 14:49:57  
Dispersant Name: Water  
Dispersant RI: 1.330  
Viscosity (cP): 0.8872  
Dispersant Dielectric Constant: 78.5

Temperature (°C): 25.0  
Count Rate (kcps): 98.8  
Cell Description: Clear disposable zeta cell  
Zeta Runs: 12  
Measurement Position (mm): 2.00  
Attenuator: 8

|                              | Mean (mV)     | Area (%) | St Dev (mV) |
|------------------------------|---------------|----------|-------------|
| Zeta Potential (mV): -5.54   | Peak 1: -5.54 | 100.0    | 3.01        |
| Zeta Deviation (mV): 3.01    | Peak 2: 0.00  | 0.0      | 0.00        |
| Conductivity (mS/cm): 0.0566 | Peak 3: 0.00  | 0.0      | 0.00        |

Result quality : Good

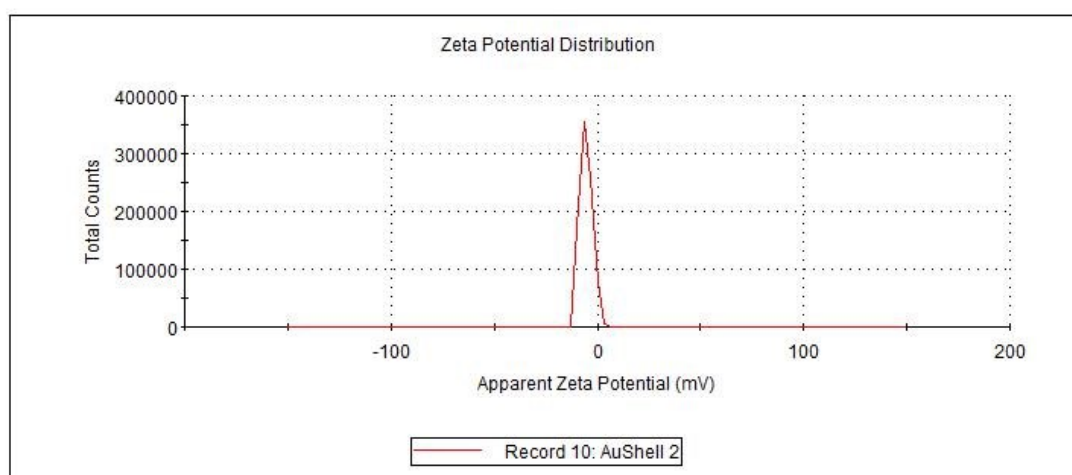

Figure. S1 Zeta potential of HGNPs

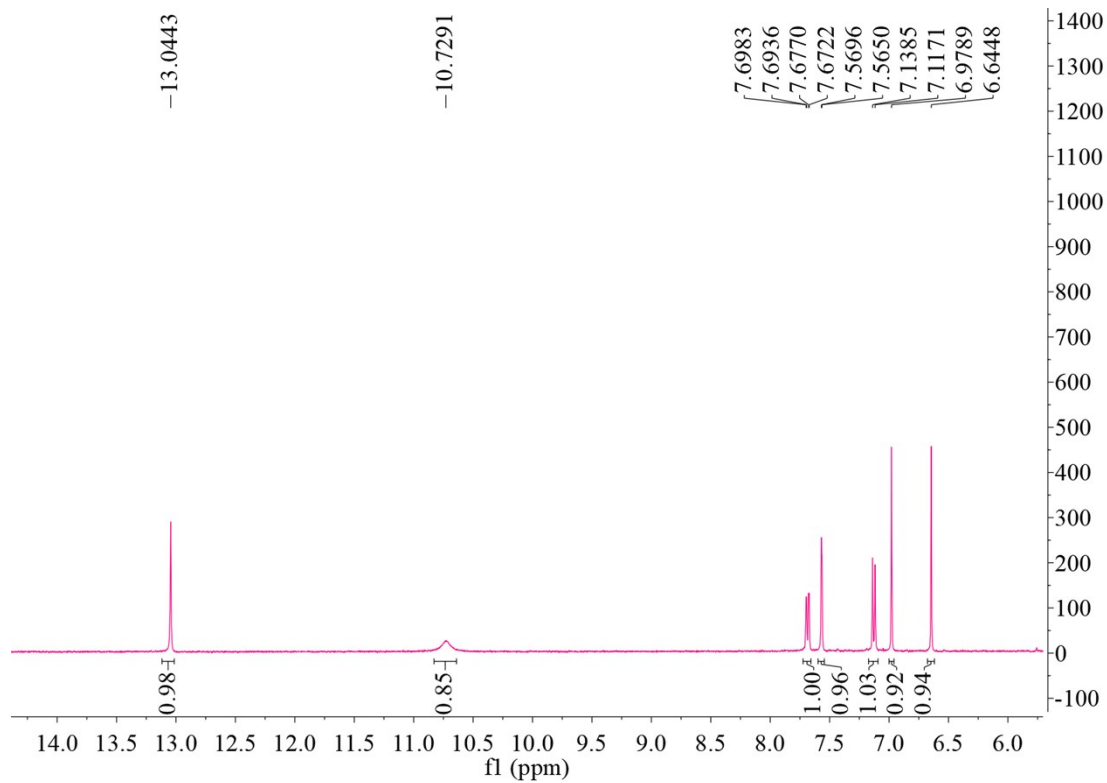

**Figure. S2-1  $^1\text{H-NMR}$  of eupatilin**

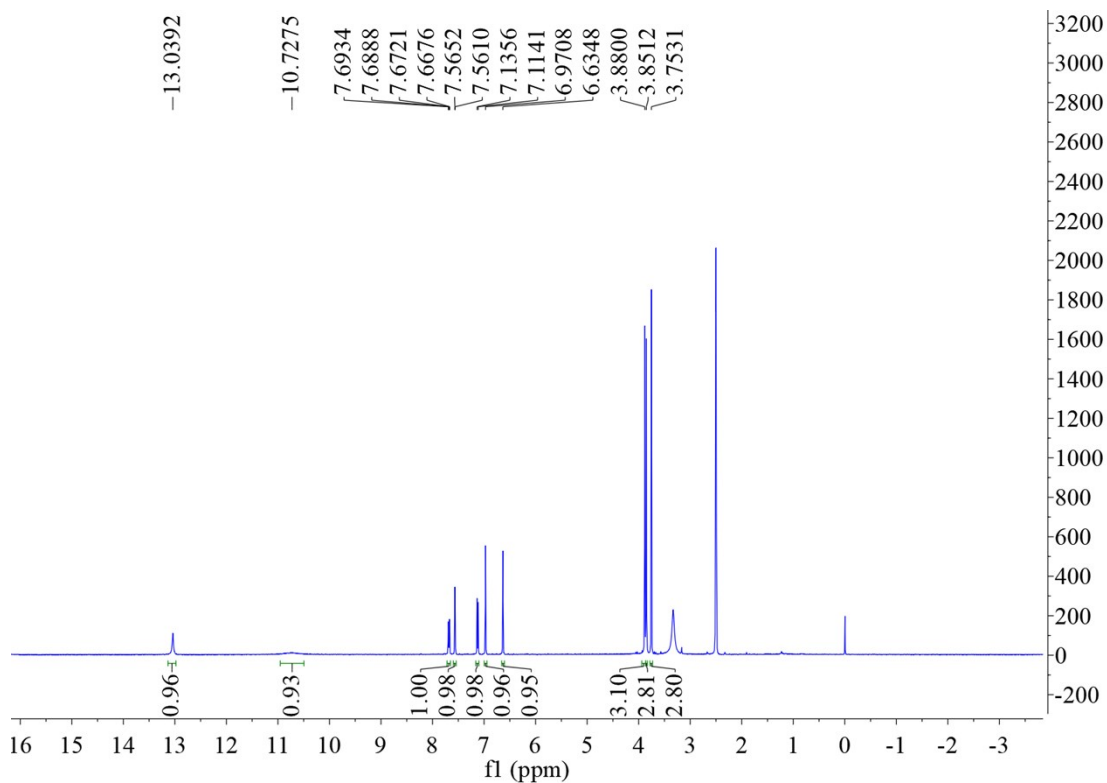

**Figure. S2-2  $^1\text{H-NMR}$  of E-HGNPs**

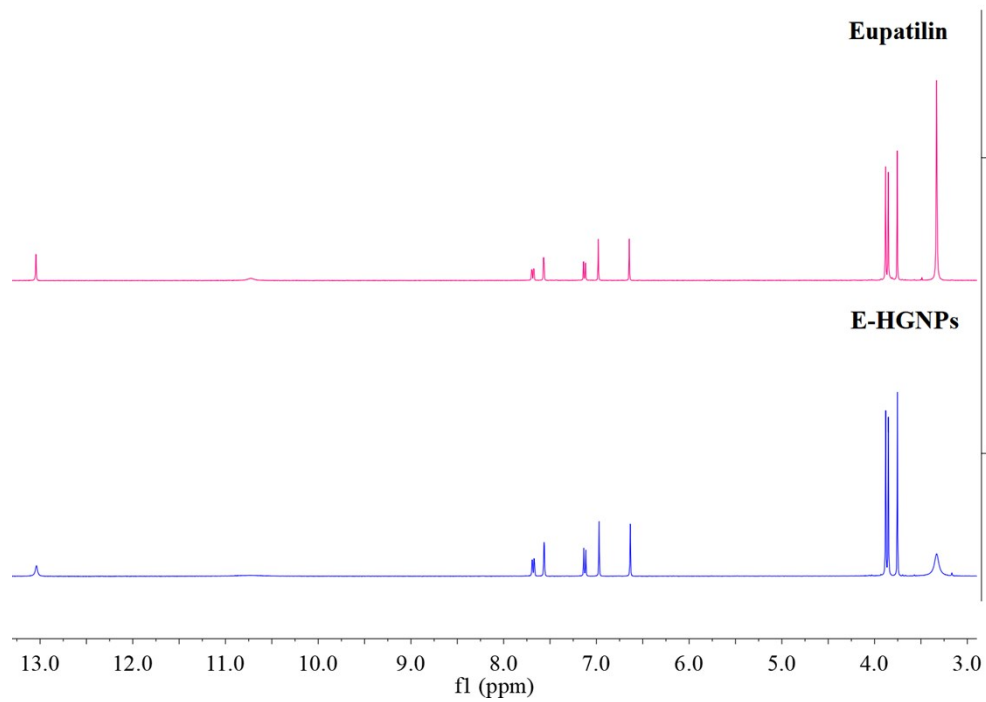

Figure. S2-3 <sup>1</sup>H-NMR of Eupatilin and E-HGNPs

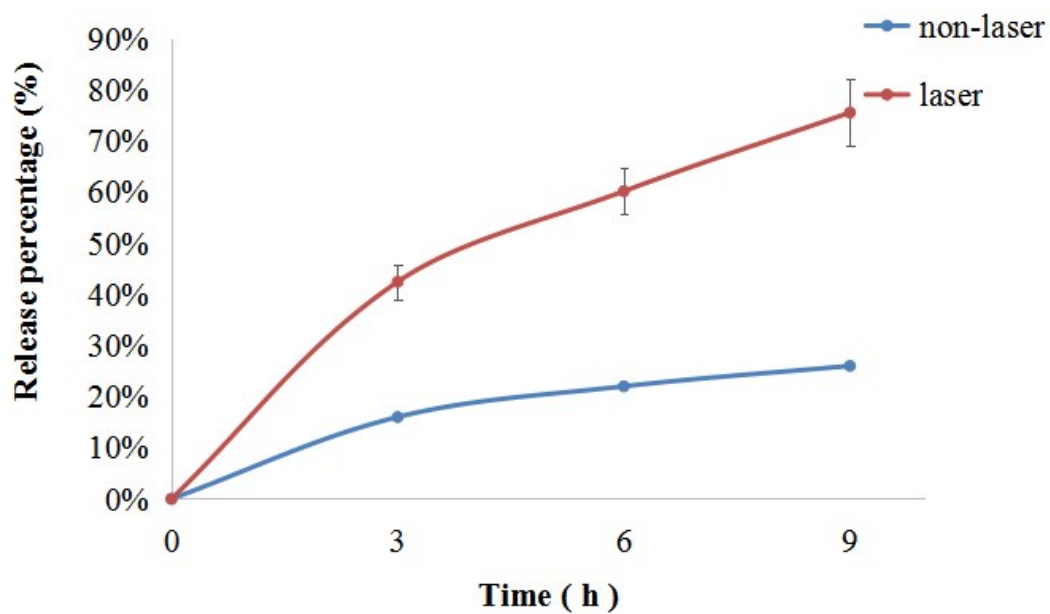

Figure. S3 Eupatilin released from E-HGNPs with or without NIR irradiation
